# Supplementary material for: AI-based histopathology image analysis reveals a distinct subset of endometrial cancers
Source: PubMed Central journal article supplement (PMC11208496; doi:10.1038/s41467-024-49017-2), 2024-06-26
Supplement: 41467_2024_49017_MOESM1_ESM.pdf [file 41467_2024_49017_MOESM1_ESM.pdf]

## Supplementary Materials

### List of Figures

**Supplementary Fig. 1:** ROC plots of the trained VarMIL networks in the (A) discovery, (B) BC validation, and (C) CC validation sets.

**Supplementary Fig. 2:** DSS and PFS KM curves associated with NSMP, *p53abn-like NSMP*, and p53abn cases in the (A) discovery set and the (B) BC validation set. The reported p-values compare the significance between p53abn-like NSMP and p53abn, computed using a two-sided log-rank statistical test.

**Supplementary Fig. 3:** DSS and PFS KM curves associated with *NSMP-like p53abn* and p53abn cases in the (A) discovery set, and the (B) BC validation set. *NSMP-like p53abn* represents cases that are p53abn as assessed by IHC but classified as NSMP based on H&E slides by the AI model (The reported p-values compare the significance between p53abn-like NSMP and p53abn, computed using a two-sided log-rank statistical test).

**Supplementary Figure 4:** Performance benchmarking of Vanilla (A), IDaRS (B), Histogram (C), DeepMIL (D), VLAD (E), CLAM-MB (F), CLAM-SB (G), and TransMIL(H) models for the discovery and validation sets.

**Supplementary Figure 5:** Kaplan Meier curves along associated with the p53abn-like NSMP and NSMP groups for the (A) discovery, (B) BC validation, and CC validation cohorts using various deep learning frameworks. Note, DSS was not available for the TCGA part of the discovery cohort (The reported p-values compare the significance between p53abn-like NSMP and p53abn, computed using a two-sided log-rank statistical test).

**Supplementary Figure 6:** Histopathological features from the slides in the BC validation cohort utilizing (A) Densnet121, (B) Swin, and (C) ResNet50 feature representations from the slides demonstrate that p53abn-like NSMP and the rest of the NSMP cases constitute two separate clusters.

**Supplementary Fig. 7:** An overview of AI tumor-normal classifier and automatic annotation. (A) Extracting tumor and stroma patches from manually annotated slide and training a binary deep model. Red regions show annotated tumor regions, while green depicts stroma sections. (B) Extracting all patches from un-annotated slides and feeding them to the trained model to highlight only the tumor ones. The final tumor regions are shown by red contours.

## List of Tables

**Supplementary Table 1:** Overview of cohorts.

**Supplementary Table 2:** Outcome information of the discovery and validation cohorts.

**Supplementary Table 3:** Treatment information of the discovery and validation cohorts.

**Supplementary Table 4:** Distribution of samples across different centres in the CC validation cohort.

**Supplementary Table 5:** Accuracy and other performance measures of the binary tumor-stroma classifier.

**Supplementary Table 6:** Performance metrics of the deep learning model for p53abn vs. NSMP classifier (based on VarMIL method). The results are based on mean  $\pm$  std of 10 cross-validation splits.

**Supplementary Table 7:** Detailed accuracy and other performance measures of the VarMIL network.

**Supplementary Table 8:** Statistics of NSMP and *p53abn-like NSMP* patients based on p53abn vs. NSMP classifiers.

**Supplementary Table 9:** Performance benchmarking of Vanilla (A), IDaRS (B), Histogram (C), DeepMIL (D), VLAD (E), CLAM-MB (F), CLAM-SB (G), and TransMIL (H) models for the discovery and validation sets.

**Supplementary Table 10:** Statistics of NSMP and p53abn-like NSMP patients based on p53abn vs. NSMP Vanilla (A), IDaRS (B), Histogram (C), DeepMIL (D), VLAD (E), CLAM-MB (F), CLAM-SB (G), and TransMIL (H) models for the discovery and validation sets.

**Supplementary Table 11:** Clinicopathologic features of the *p53abn-like NSMP* group in the discovery set.

**Supplementary Table 12:** Clinicopathologic features of the *p53abn-like NSMP* group in the BC validation set without excluding any patients.

**Supplementary Table 13:** Clinicopathologic features of the *p53abn-like NSMP* group in the CC validation set without excluding any patients.

**Supplementary Table 14:** Multi-variate Cox regression analysis showing the prognostic significance of *p53abn-like NSMP* group PFS for the entire cohort.

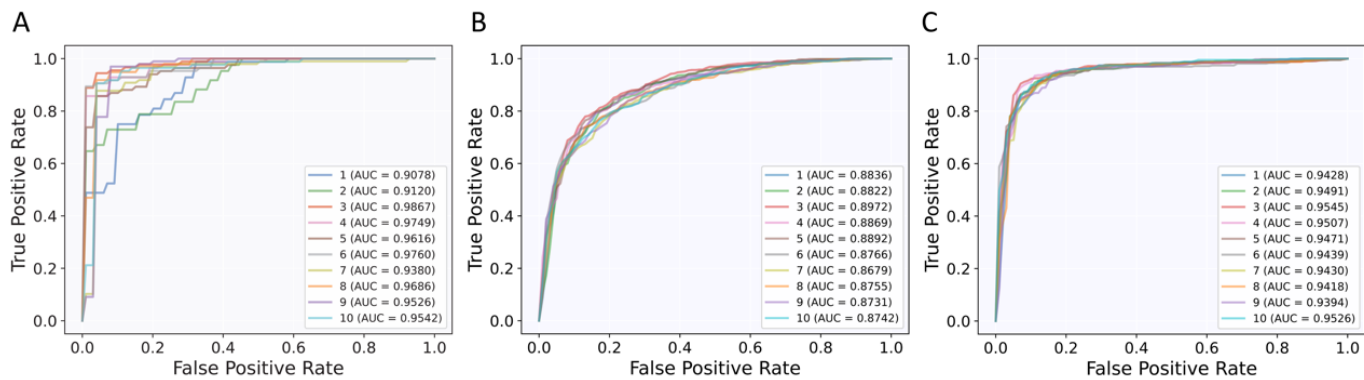

**Supplementary Fig. 1:** ROC plots of the trained VarMIL networks in the (A) discovery, (B) BC validation, and (C) CC validation sets.

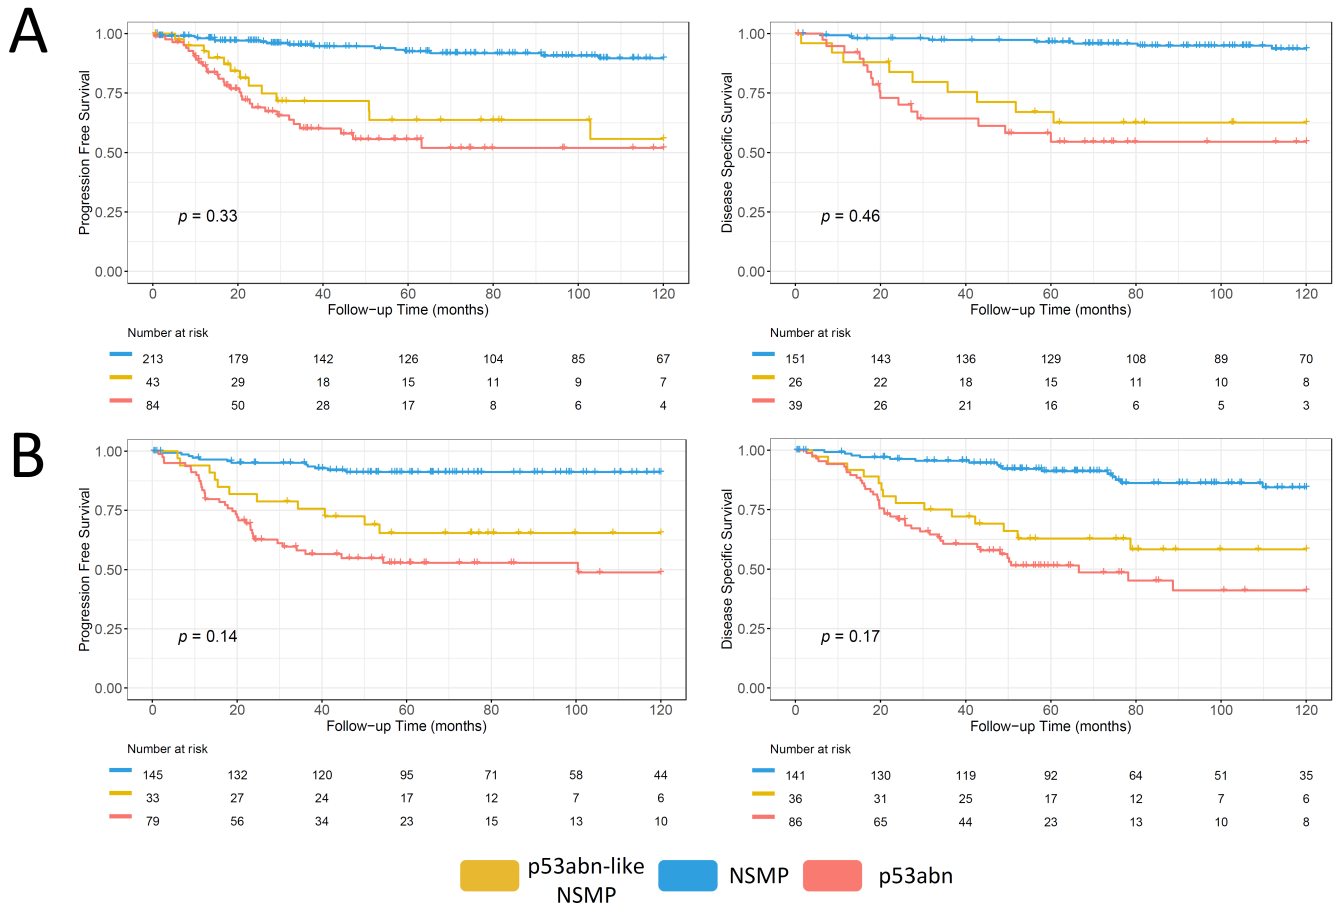

**Supplementary Fig. 2:** DSS and PFS KM curves associated with NSMP, *p53abn-like NSMP*, and *p53abn* cases in the (A) discovery set and the (B) BC validation set. The reported p-values compare the significance between *p53abn-like NSMP* and *p53abn*, computed using a two-sided log-rank statistical test.



**A**

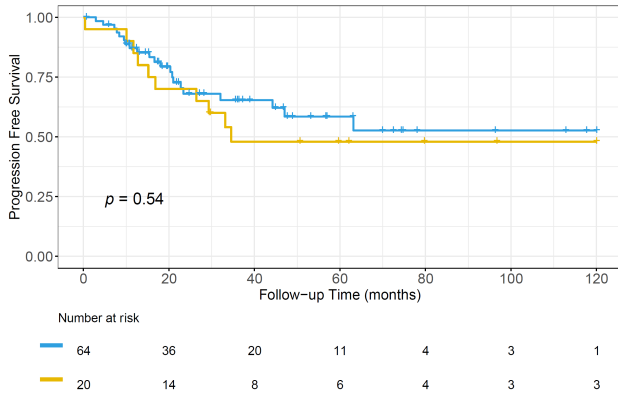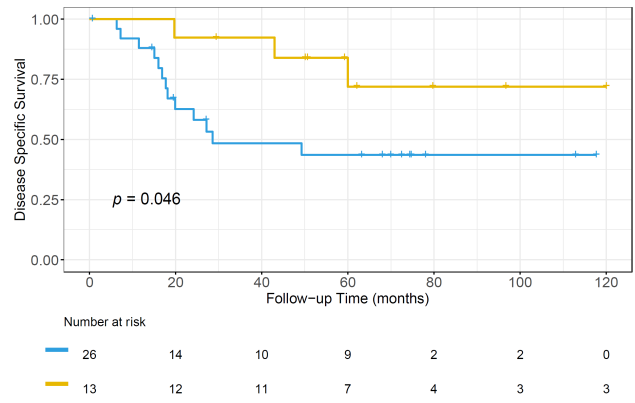

**B**

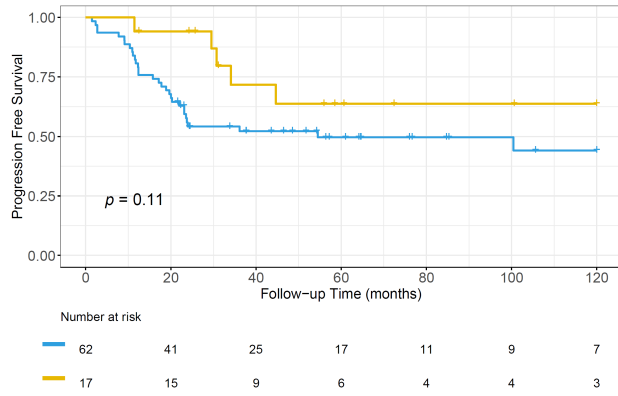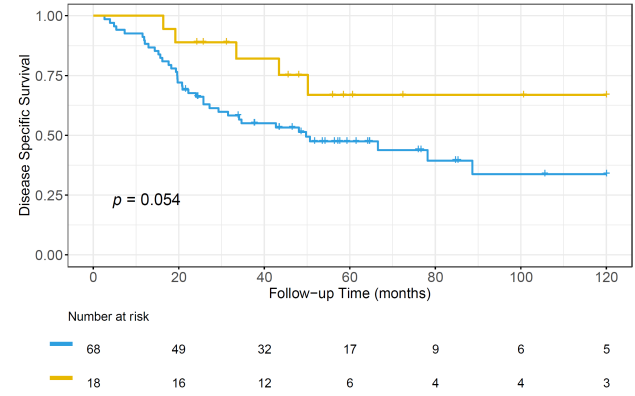

NSMP-like p53abn
  p53abn

**Supplementary Fig. 3:** DSS and PFS KM curves associated with *NSMP-like p53abn* and *p53abn* cases in the (A) discovery set, and the (B) BC validation set. *NSMP-like p53abn* represents cases that are *p53abn* as assessed by IHC but classified as NSMP based on H&E slides by the AI model (The reported p-values compare the significance between *p53abn*-like NSMP and *p53abn*, computed using a two-sided log-rank statistical test).

A: Vanilla

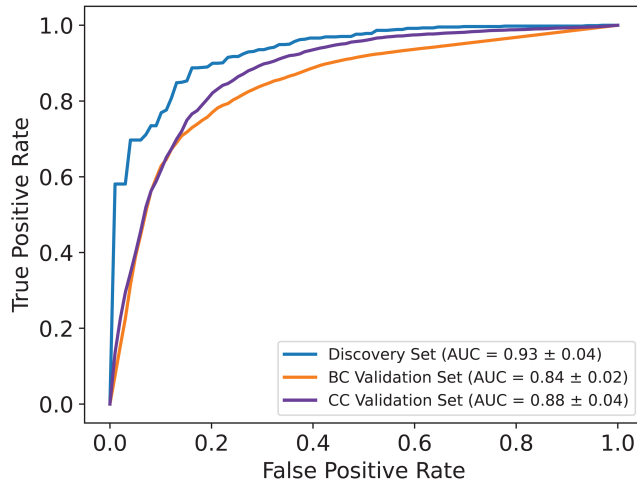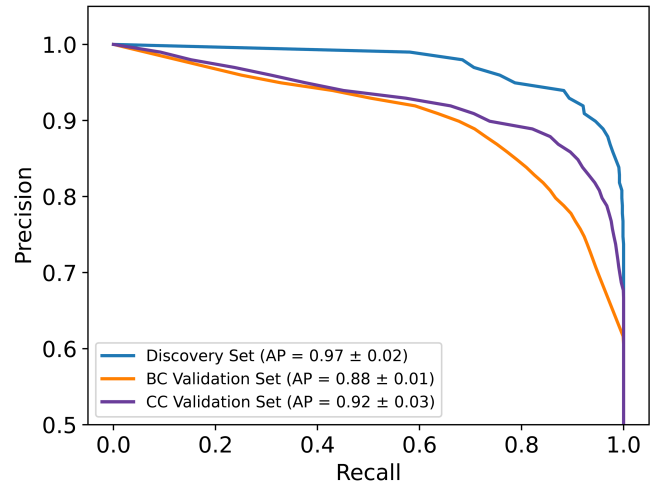

B: IDaRS

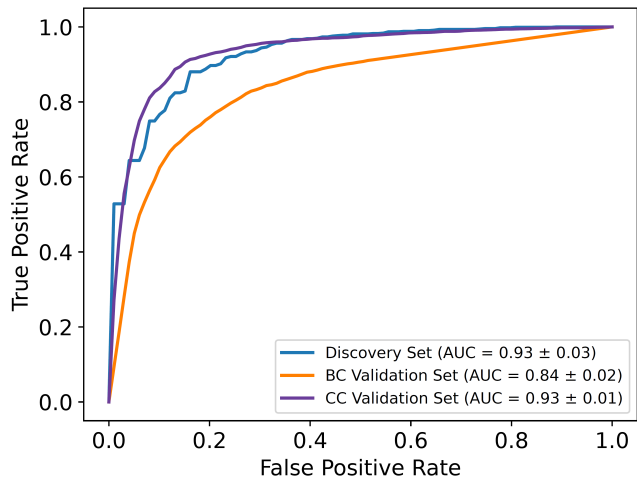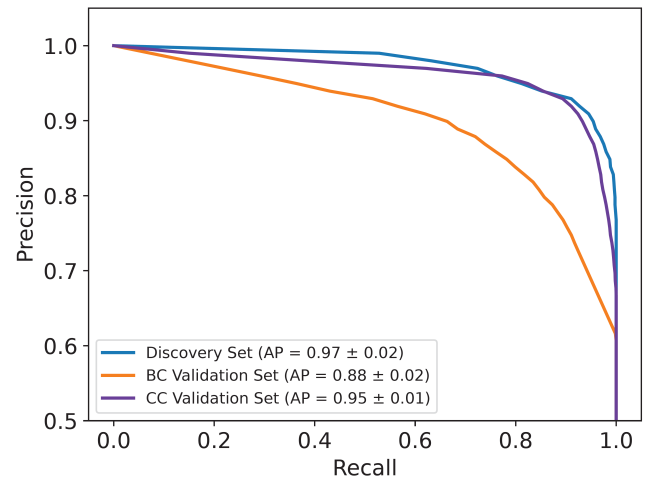

C: Histogram

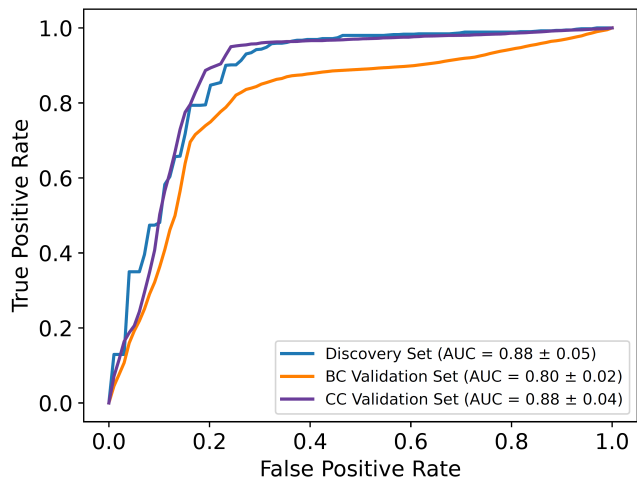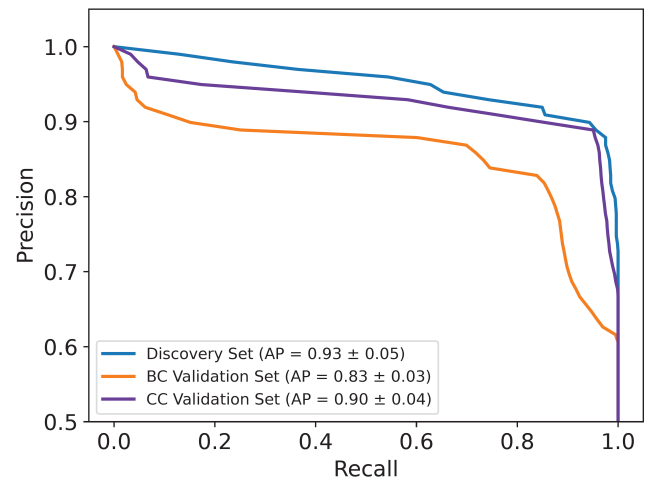

D: DeepMIL

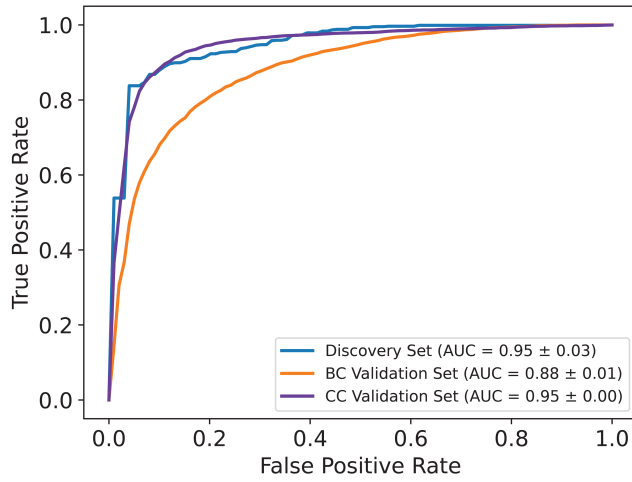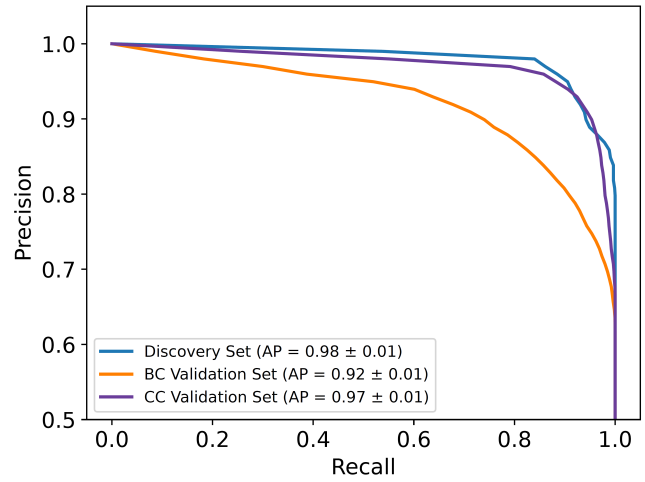

E: VLAD

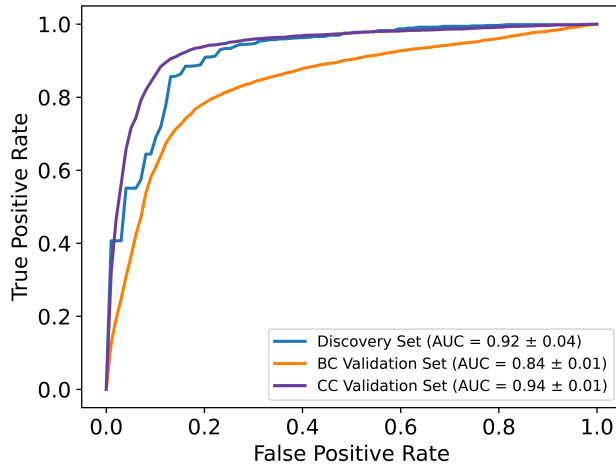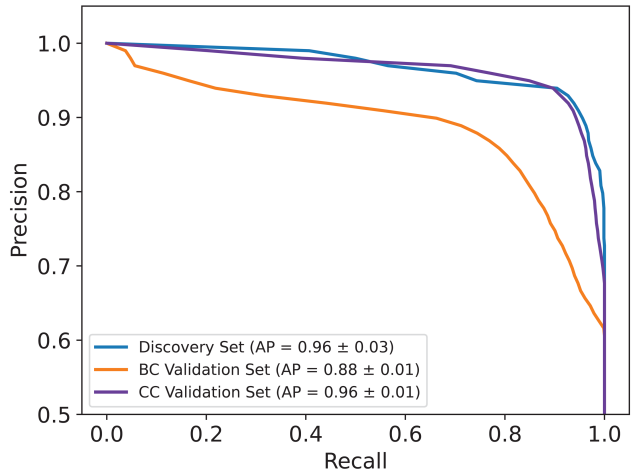

F: CLAM-MB

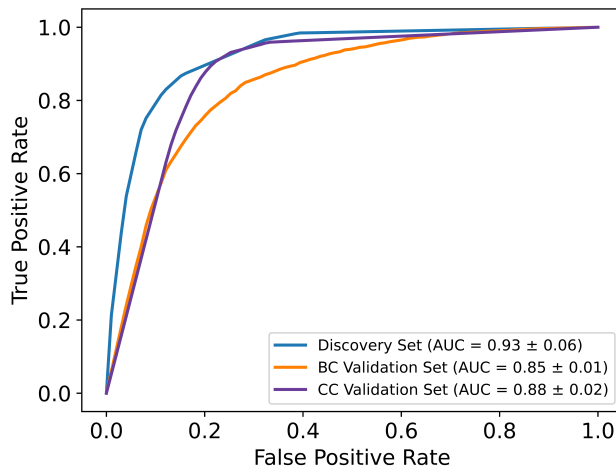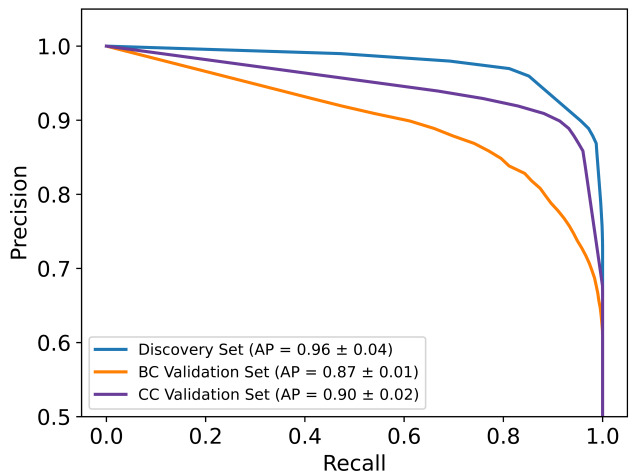

G: CLAM-SB

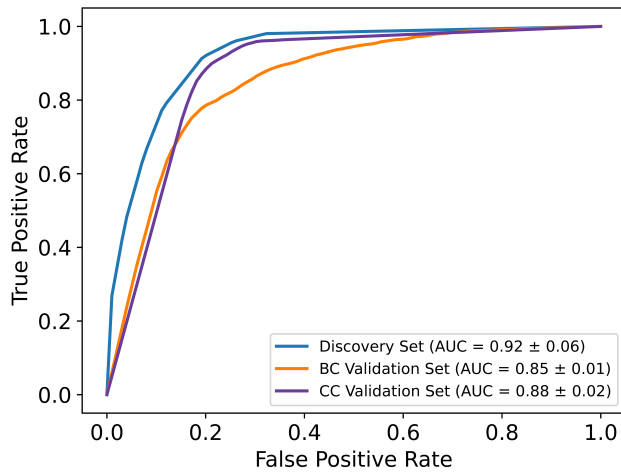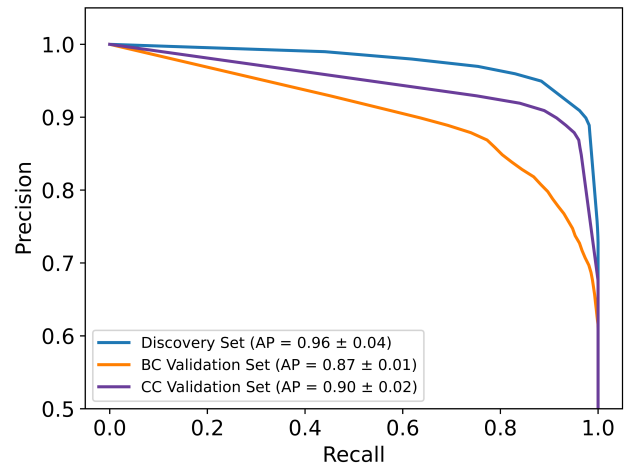

H: TransMIL

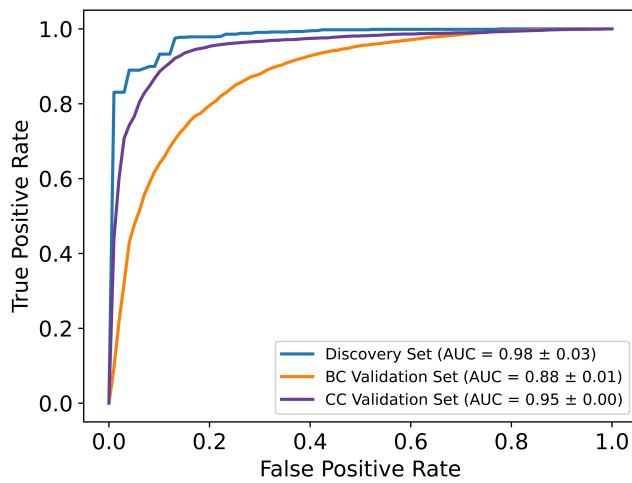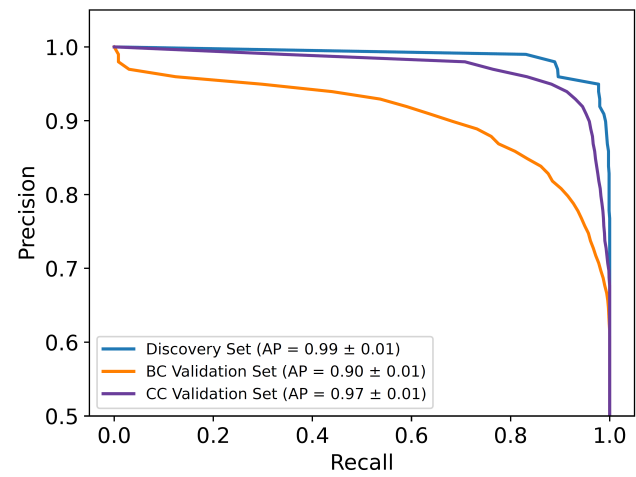

**Supplementary Figure 4:** Performance benchmarking of Vanilla (A), IDaRS (B), Histogram (C), DeepMIL (D), VLAD (E), CLAM-MB (F), CLAM-SB (G), and TransMIL(H) models for the discovery and validation sets.

## A: Discovery cohort

### Vanilla

DSS

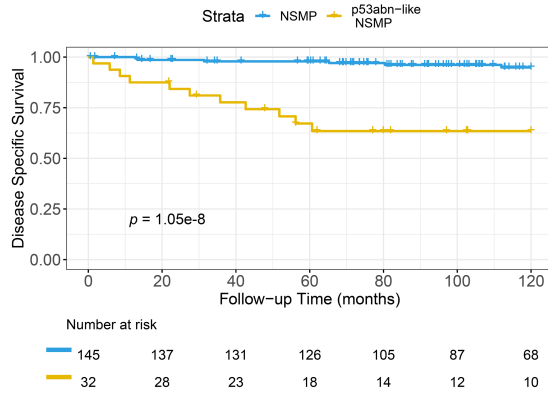

PFS

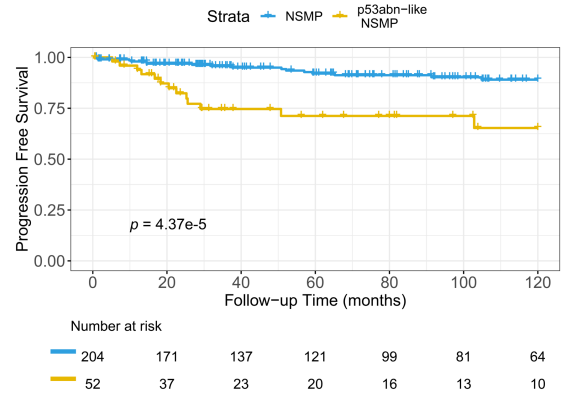

### IDaRS

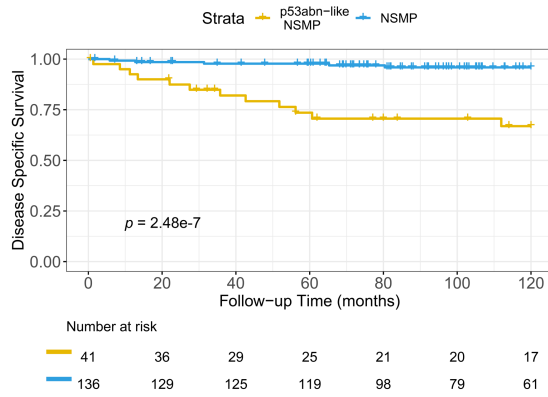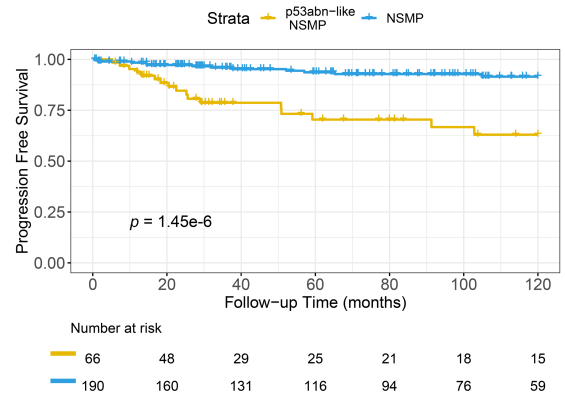

### Histogram-based

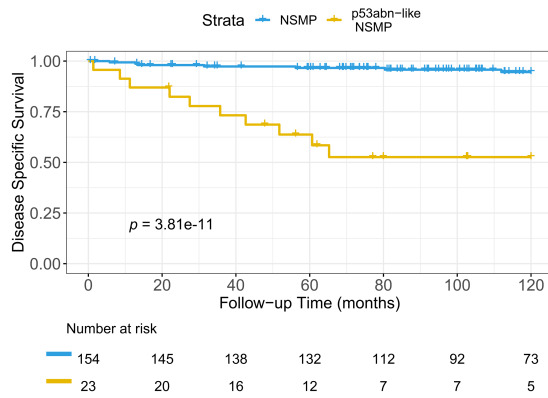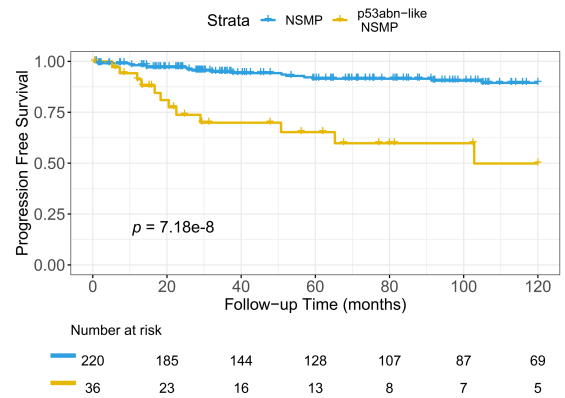

## DeepMIL

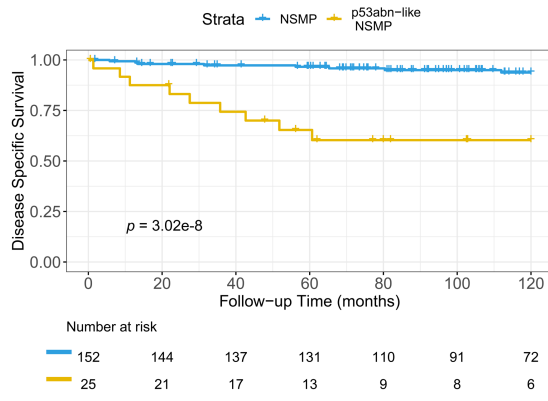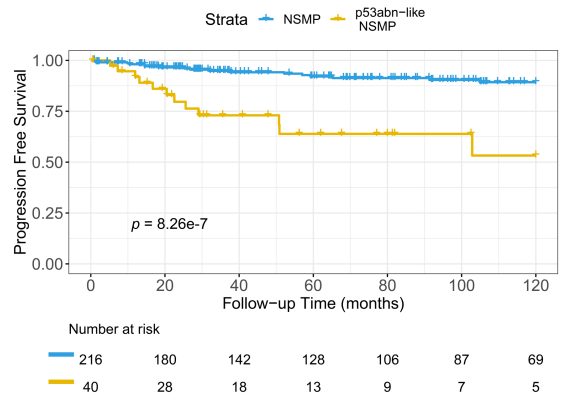

## VLAD

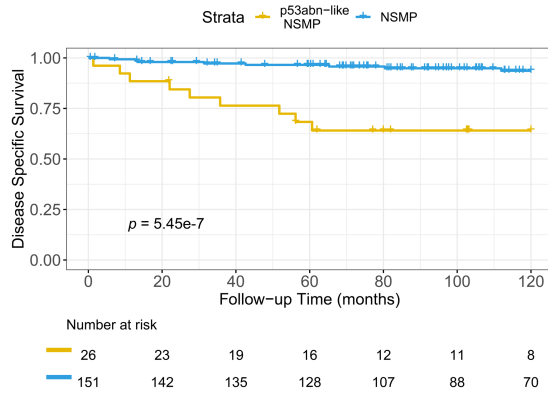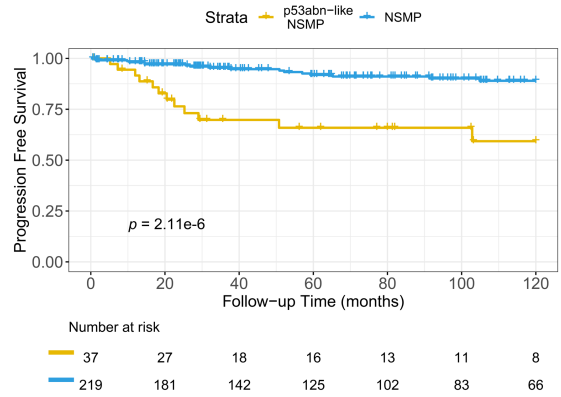

## CLAM-MB

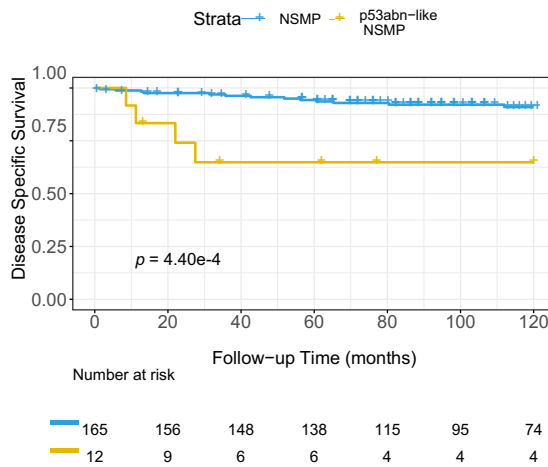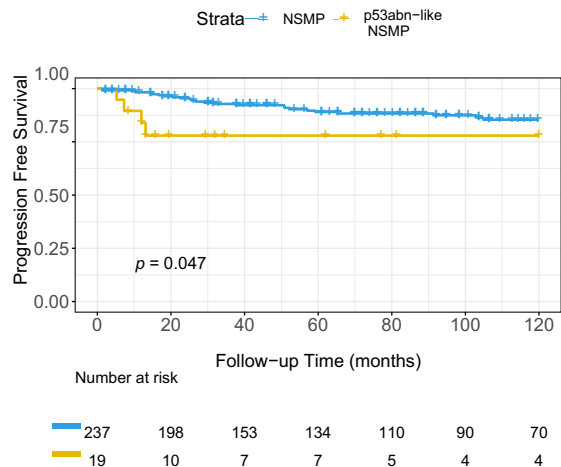

## CLAM-SB

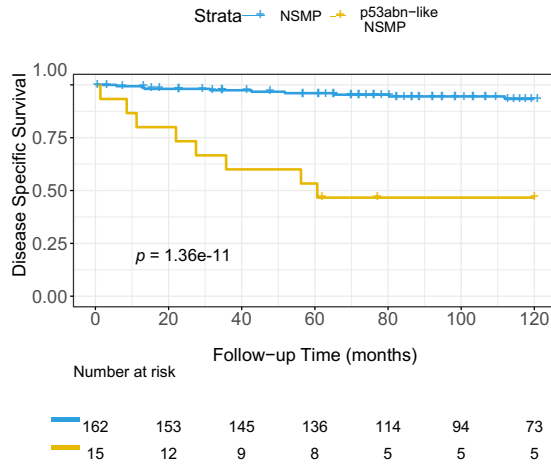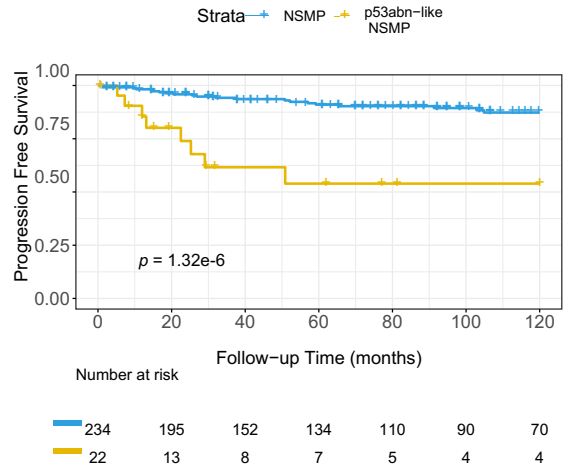

## TransMIL

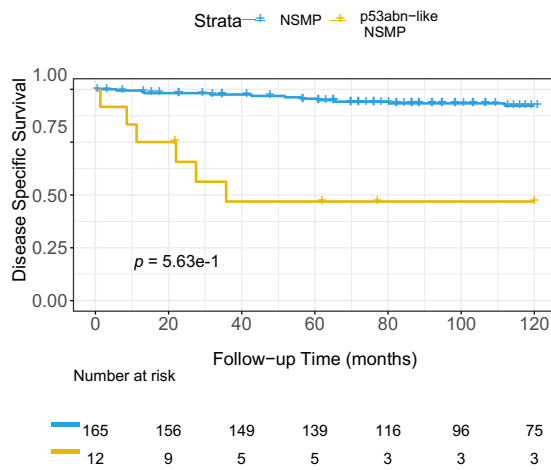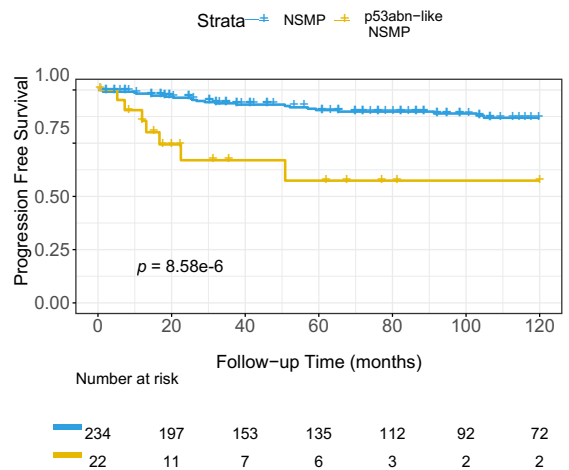

## B: BC validation cohort DSS

### Vanilla

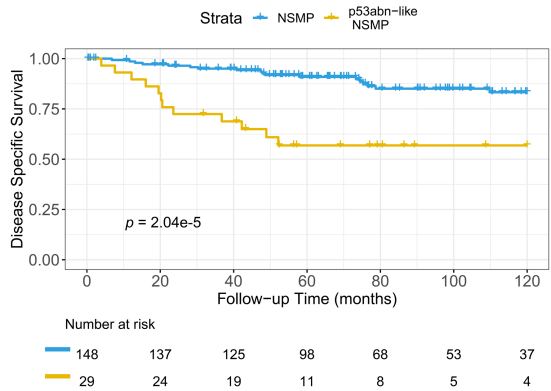

### PFS

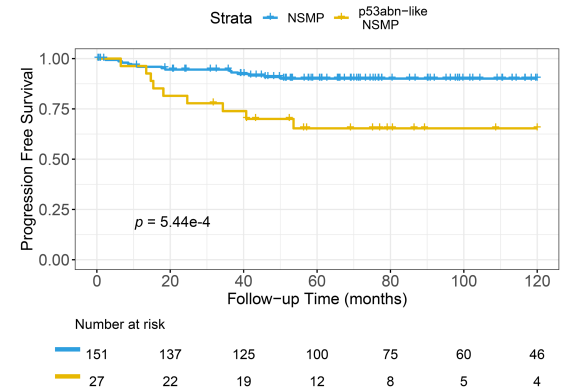

## IDaRS

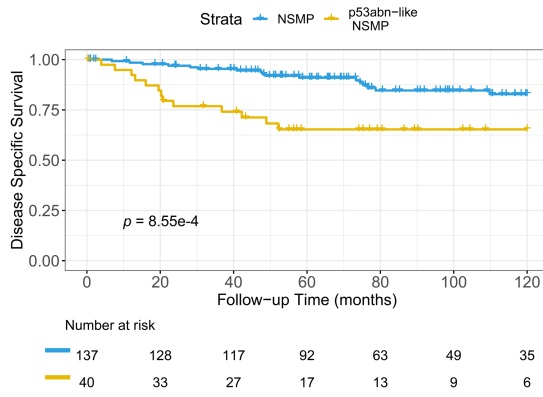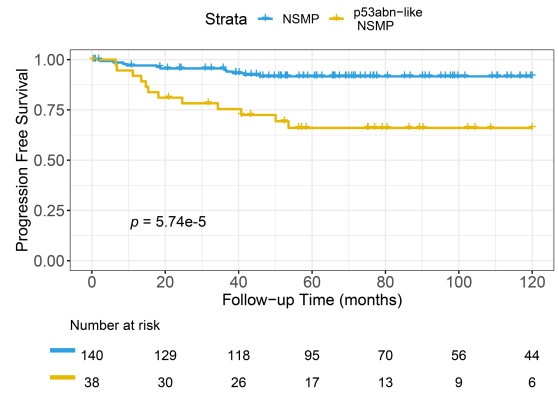

## Histogram-based

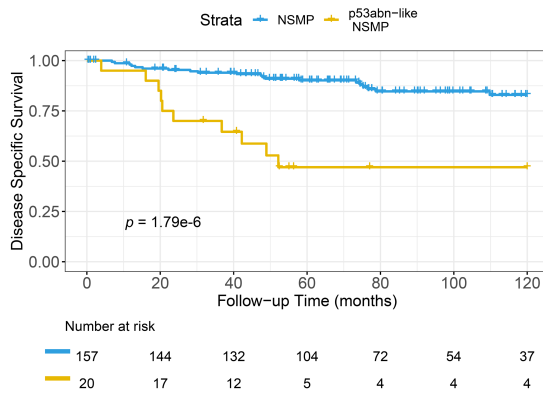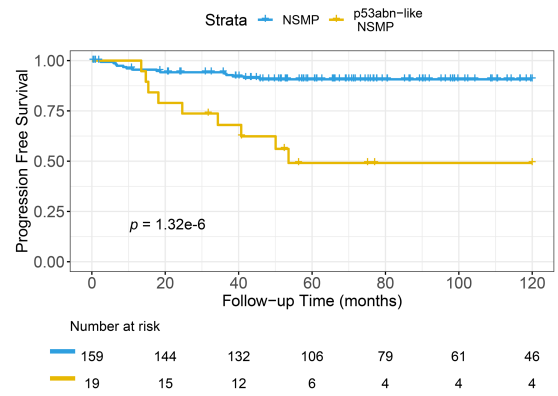

## DeepMIL

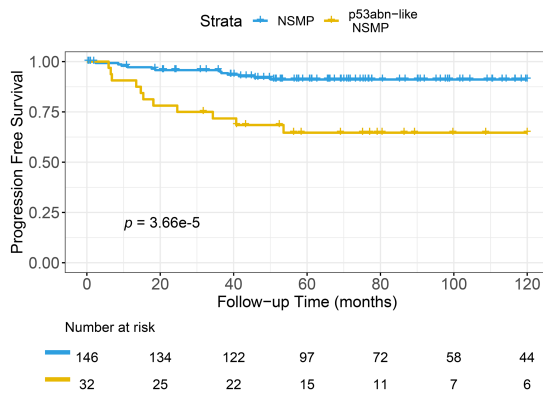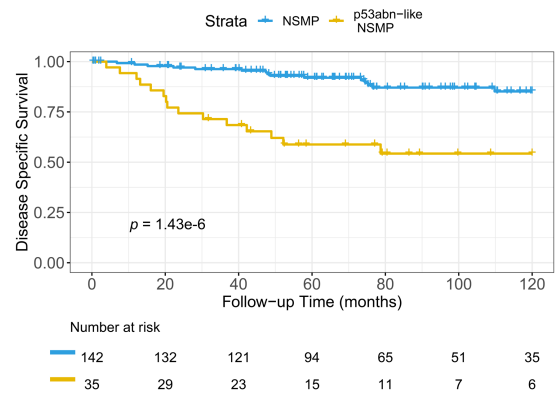

## VLAD

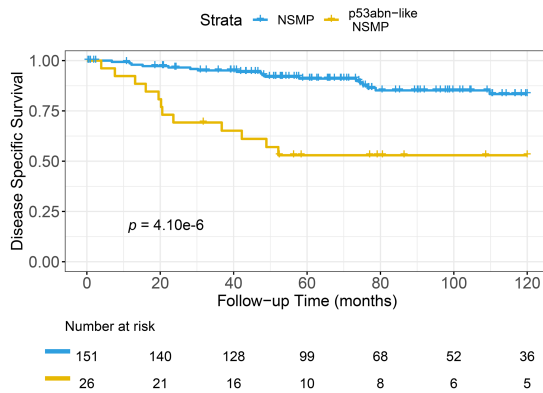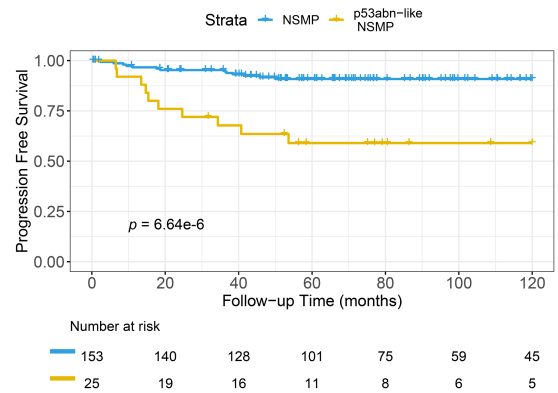



### CLAM-MB

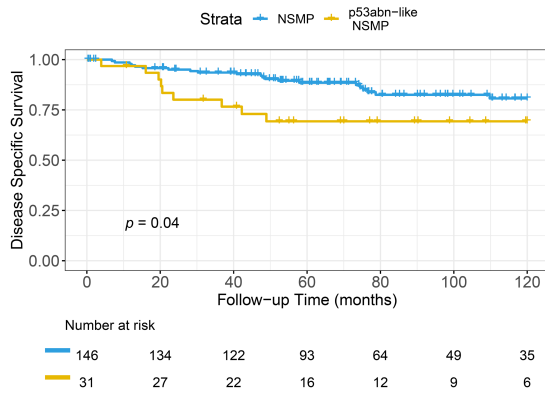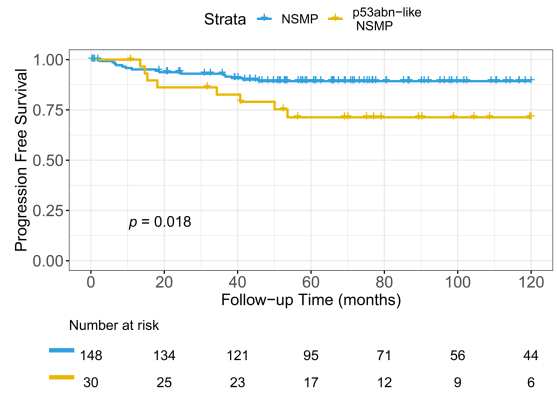

### CLAM-SB

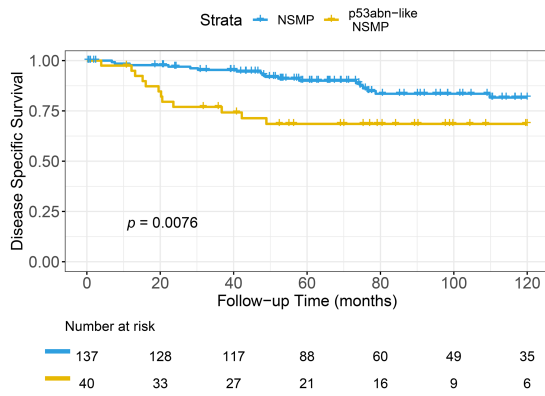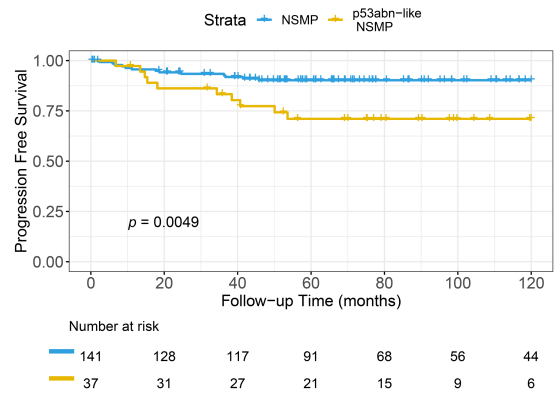

### TransMIL

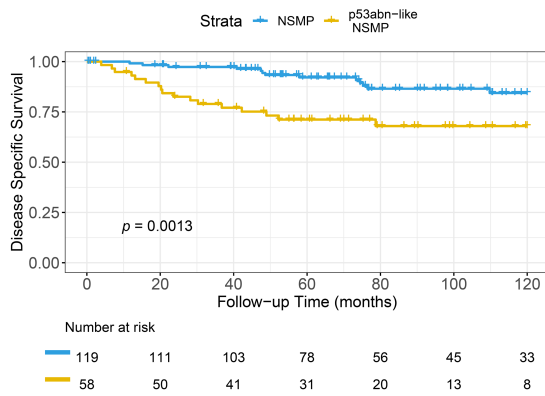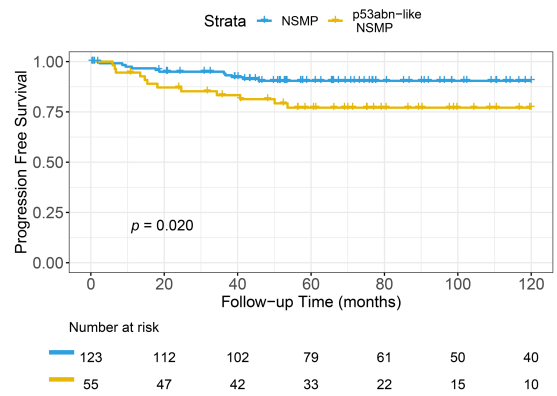

### C: CC validation cohort

## Vanilla

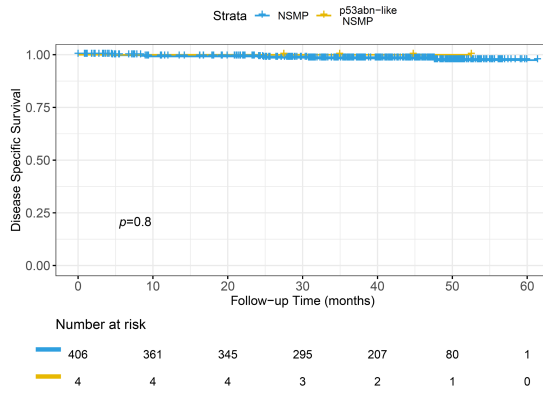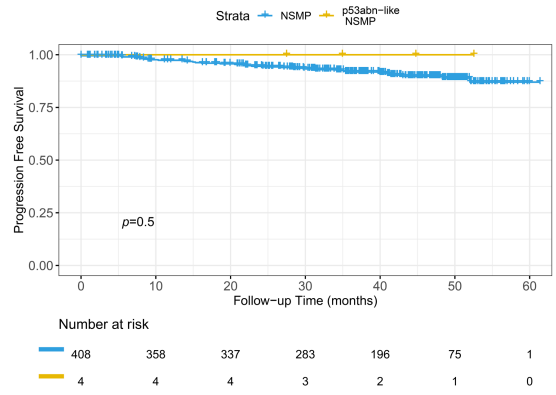

## IDaRS

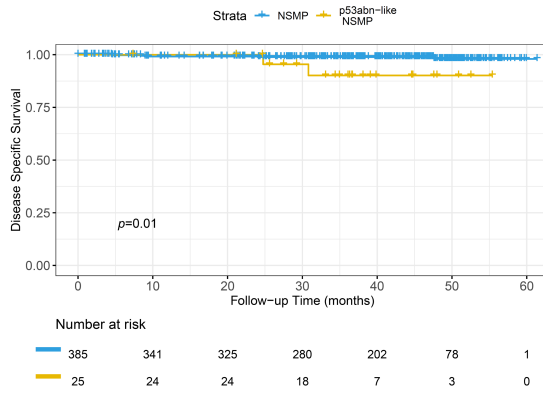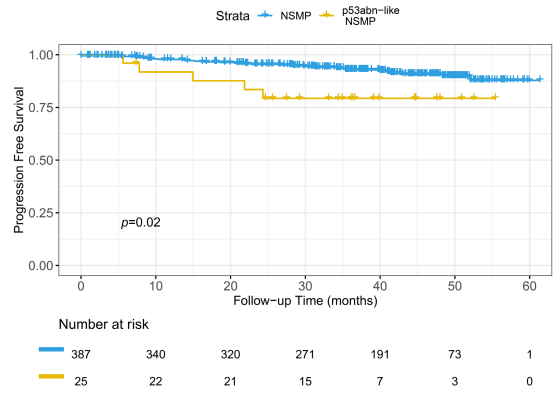

## Histogram-based

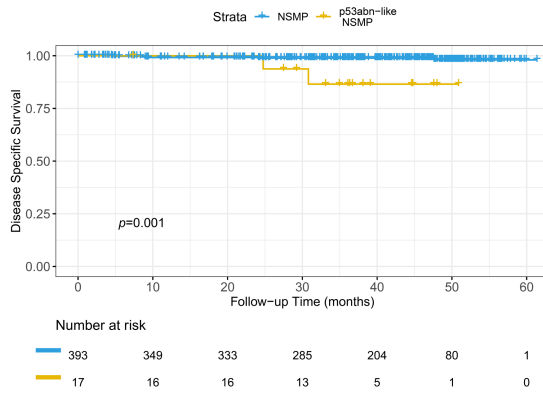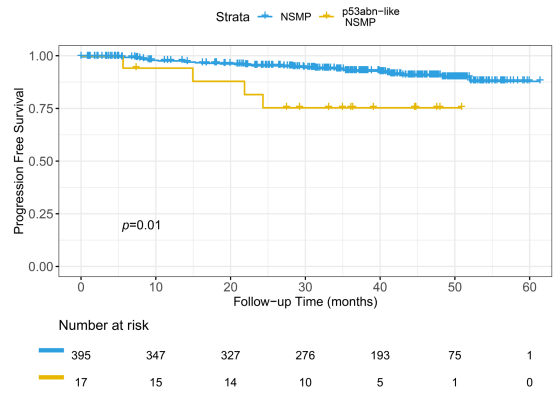

## DeepMIL

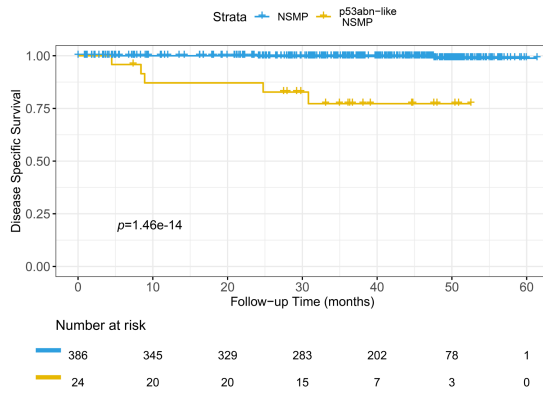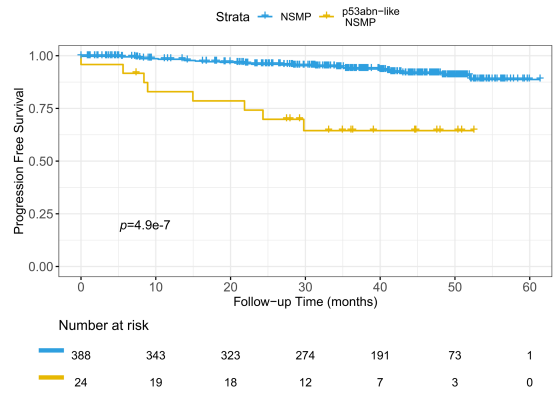

## VLAD

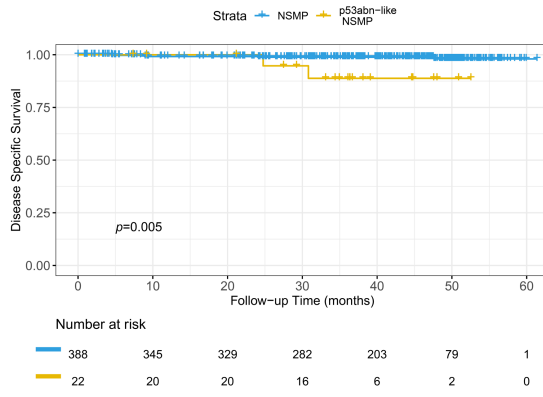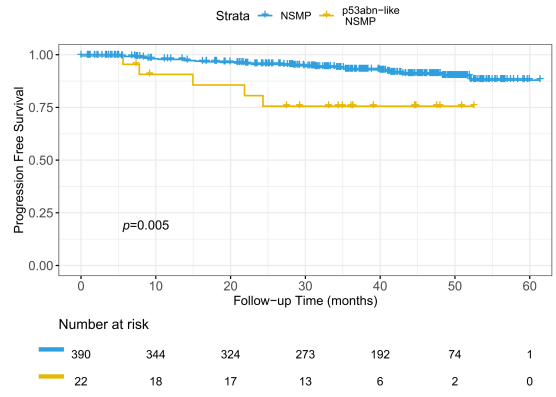

## CLAM-MB

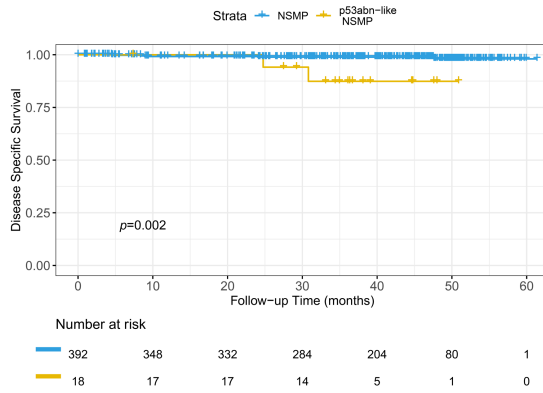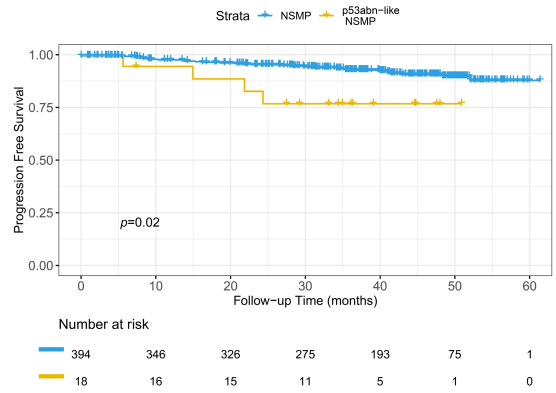

## CLAM-SB

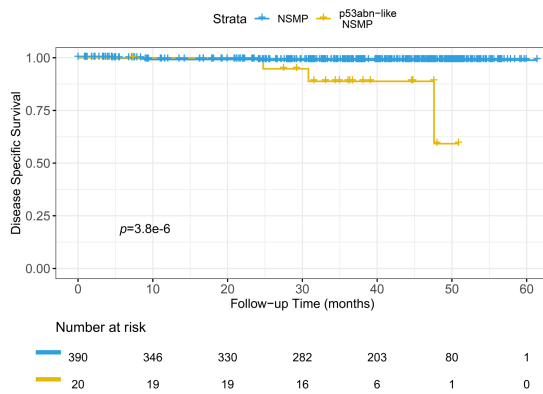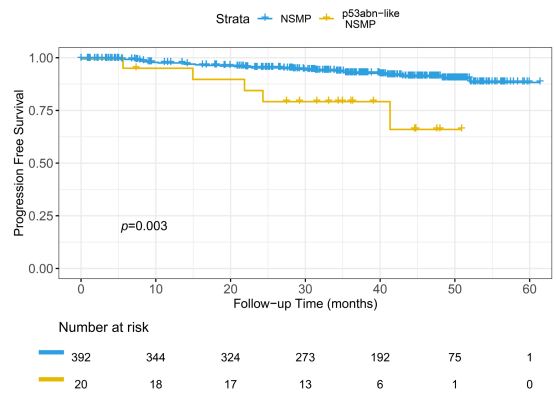

## TransMIL

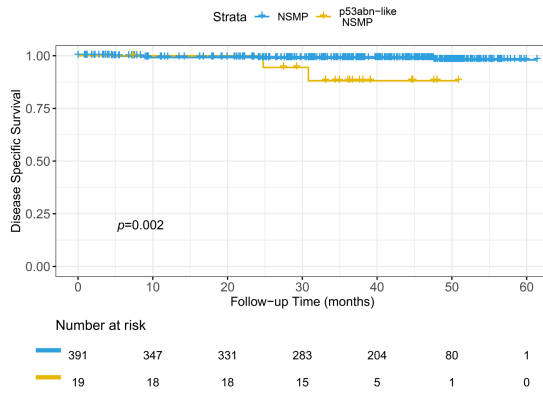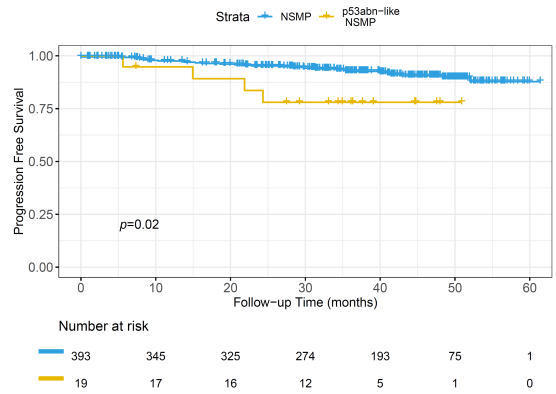

**Supplementary Figure 5:** Kaplan Meier curves along associated with the p53abn-like NSMP and NSMP groups for the (A) discovery, (B) BC validation, and CC validation cohorts using various deep learning frameworks. Note, DSS was not available for the TCGA part of the discovery cohort (The reported p-values compare the significance between p53abn-like NSMP and p53abn, computed using a two-sided log-rank statistical test).

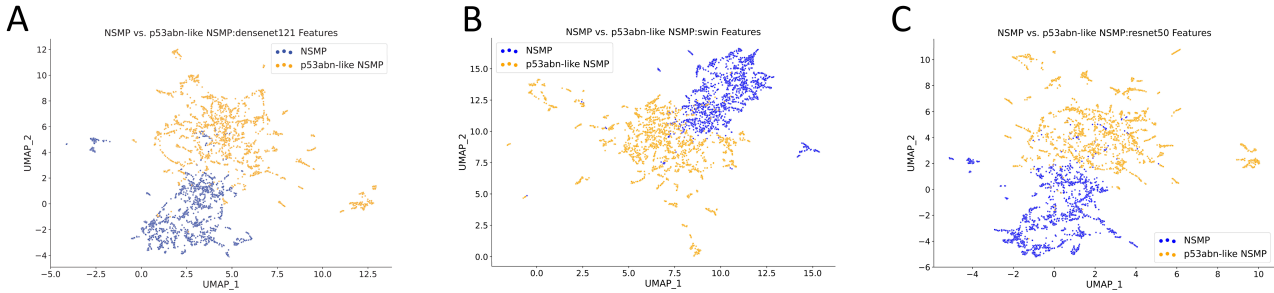

**Supplementary Figure 6:** Histopathological features from the slides in the BC validation cohort utilizing (A) Densenet121, (B) Swin, and (C) ResNet50 feature representations from the slides demonstrate that p53abn-like NSMP and the rest of the NSMP cases constitute two separate clusters.

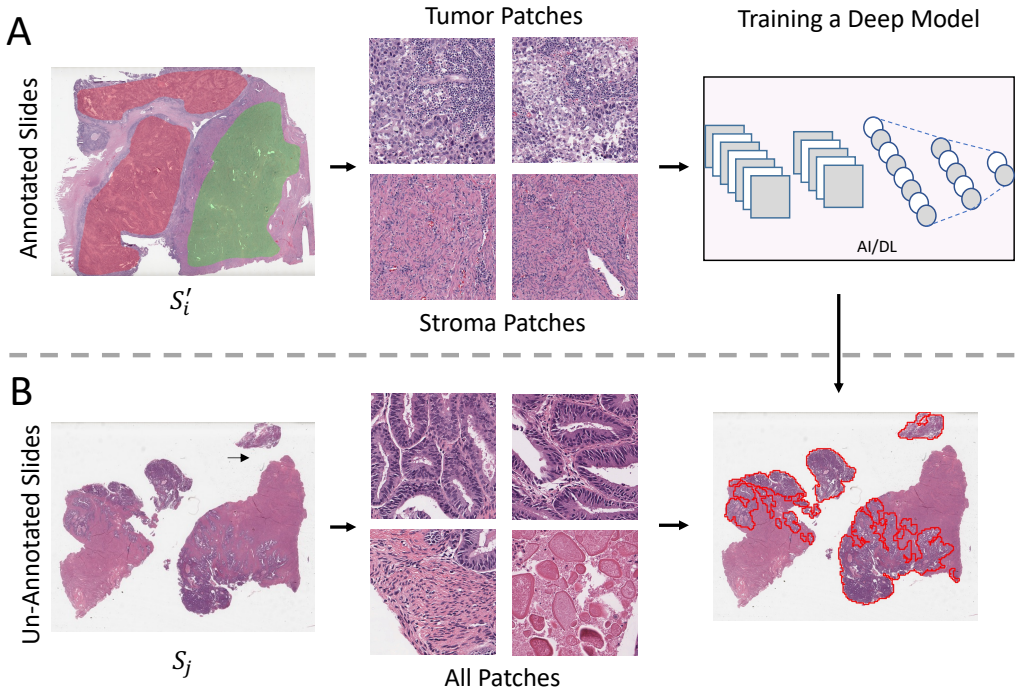

**Supplementary Fig. 7:** An overview of AI tumor-normal classifier and automatic annotation. (A) Extracting tumor and stroma patches from manually annotated slide and training a binary deep model. Red regions show annotated tumor regions, while green depicts stroma sections. (B) Extracting all patches from un-annotated slides and feeding them to the trained model to highlight only the tumor ones. The final tumor regions are shown by red contours.

**Supplementary Table 1: Overview of cohorts.**

| Dataset                | Unit                                          | Subtype |         |
|------------------------|-----------------------------------------------|---------|---------|
|                        |                                               | NSMP    | p53abn  |
| TCGA<br>(WSIs)         | Patients                                      | 90      | 56      |
|                        | Slides                                        | 94      | 61      |
|                        | Manually Annotated Slides by Pathologists     | 14      | 13      |
|                        | 512×512 Pixel Patches at 20x                  | 162,998 | 82,655  |
| German<br>(WSIs)       | Patients                                      | 182     | 40      |
|                        | Slides                                        | 355     | 76      |
|                        | Manually Annotated Slides by Pathologists     | 0       | 0       |
|                        | 512×512 Pixel Patches at 20x                  | 576,553 | 125,376 |
| Vancouver<br>(TMAs)    | Patients                                      | 195     | 95      |
|                        | Slides                                        | 670     | 422     |
|                        | 512×512 Pixel Patches at 20x with 65% Overlap | 15,584  | 10,251  |
| Cross Canada<br>(WSIs) | Patients                                      | 416     | 198     |
|                        | Slides                                        | 432     | 208     |
|                        | Manually Annotated Slides by Pathologists     | 0       | 0       |
|                        | 512×512 Pixel Patches at 20x                  | 696,340 | 414,019 |

**Supplementary Table 2:** Outcome information of the discovery and validation cohorts.

| Source                  |                                          |          | NSMP         | <i>p53abn-like<br/>NSMP</i> | p53abn       |
|-------------------------|------------------------------------------|----------|--------------|-----------------------------|--------------|
| Discovery Cohort        | Disease Specific<br>(German)             | Total    | 155 (69.82%) | 27 (12.16%)                 | 40 (18.02%)  |
|                         |                                          | Censored | 143 (92.26%) | 17 (62.96%)                 | 23 (57.50%)  |
|                         |                                          | Event    | 8 (5.16%)    | 9 (33.33%)                  | 16 (40.00%)  |
|                         |                                          | Unk      | 4 (2.58%)    | 1 (3.70%)                   | 1 (2.50%)    |
|                         | Progression Free<br>(German and<br>TCGA) | Total    | 221 (60.88%) | 47 (12.95%)                 | 95 (26.17%)  |
|                         |                                          | Censored | 197 (89.14%) | 30 (63.82%)                 | 53 (55.79%)  |
|                         |                                          | Event    | 16 (7.24%)   | 13 (27.66%)                 | 31 (32.63%)  |
|                         |                                          | Unk      | 8 (3.62%)    | 4 (8.51%)                   | 11 (11.58%)  |
| BC Validation<br>Cohort | Disease Specific                         | Total    | 155 (53.82%) | 38 (13.19%)                 | 95 (32.99%)  |
|                         |                                          | Censored | 125 (80.65%) | 22 (57.89%)                 | 44 (46.32%)  |
|                         |                                          | Event    | 16 (10.32%)  | 14 (36.84%)                 | 42 (44.21%)  |
|                         |                                          | Unk      | 14 (9.03%)   | 2 (5.26%)                   | 9 (9.47%)    |
|                         | Progression Free                         | Total    | 155 (53.82%) | 38 (13.19%)                 | 95 (32.99%)  |
|                         |                                          | Censored | 133 (85.81%) | 22 (57.89%)                 | 43 (45.26%)  |
|                         |                                          | Event    | 12 (7.74%)   | 11 (28.95%)                 | 36 (37.89%)  |
|                         |                                          | Unk      | 10 (6.45%)   | 5 (13.16%)                  | 16 (16.82%)  |
| CC Validation<br>Cohort | Disease Specific                         | Total    | 390 (63.52%) | 26 (4.23%)                  | 198 (32.25%) |
|                         |                                          | Censored | 382 (97.95%) | 21 (80.87%)                 | 165 (80.05%) |
|                         |                                          | Event    | 2 (0.51%)    | 5 (19.23%)                  | 29 (14.95%)  |
|                         |                                          | Unk      | 6 (1.54%)    | 0                           | 4 (2.06%)    |
|                         | Progression Free                         | Total    | 390 (63.52%) | 26 (4.23%)                  | 198 (32.25%) |
|                         |                                          | Censored | 360 (92.31%) | 18 (69.23%)                 | 135 (68.18%) |
|                         |                                          | Event    | 26 (6.67%)   | 8 (30.77%)                  | 63 (31.82%)  |
|                         |                                          | Unk      | 4 (1.03%)    | 0                           | 0            |

**Supplementary Table 3:** Treatment information of the discovery and validation cohorts.

|                              | <b>Treatment</b>      | <b>Total</b> | <b>NSMP</b>  | <b>p53abn</b> |
|------------------------------|-----------------------|--------------|--------------|---------------|
| Discovery Cohort<br>(German) | Total                 | 217          | 178          | 39            |
|                              | None                  | 76 (32.02)   | 68 (37.99%)  | 8 (20.51%)    |
|                              | RT only               | 8 (3.69%)    | 6 (3.35%)    | 2 (5.13%)     |
|                              | brachy only           | 66 (30.41%)  | 63 (35.20%)  | 3 (7.69%)     |
|                              | brachy+RT             | 4 (1.84%)    | 3 (1.68%)    | 1 (2.56%)     |
|                              | chemo only            | 23 (10.60%)  | 9 (5.03%)    | 14 (35.90%)   |
|                              | chemo+RT              | 5 (2.30%)    | 3 (1.68%)    | 2 (5.13%)     |
|                              | chemo+brach+RT        | 1 (0.46%)    | 1 (0.56%)    | 0             |
|                              | chemo+brachy          | 3 (1.38%)    | 1 (0.56%)    | 2 (5.13%)     |
| N / A                        | 31 (14.29%)           | 24 (13.41%)  | 7 (17.95%)   |               |
| BC Validation Cohort         | Total                 | 288          | 193          | 95            |
|                              | None                  | 158 (54.86%) | 128 (66.32%) | 30 (31.58%)   |
|                              | Rt only               | 47 (16.32%)  | 31 (16.06%)  | 16 (16.84%)   |
|                              | Brachy only           | 5 (1.74%)    | 4 (2.07%)    | 1 (1.05%)     |
|                              | Chemo only            | 27 (9.38%)   | 6 (3.11%)    | 21 (22.11%)   |
|                              | Chemo + RT            | 43 (14.93%)  | 21 (10.88%)  | 22 (23.16%)   |
|                              | N / A                 | 8 (2.78%)    | 3 (1.55%)    | 5 (5.26%)     |
| CC Validation Cohort         | Total                 | 614          | 416          | 198           |
|                              | None                  | 342 (55.7%)  | 284 (68.27%) | 58 (29.29%)   |
|                              | RT only               | 28 (4.56%)   | 21 (5.05%)   | 7 (3.54%)     |
|                              | brachy only           | 66 (10.75%)  | 53 (12.74%)  | 13 (6.57%)    |
|                              | chemo+brachy+RT       | 26 (4.23%)   | 10 (2.4%)    | 16 (8.08%)    |
|                              | chemo+brachy          | 33 (5.37%)   | 5 (1.2%)     | 28 (14.14%)   |
|                              | chemo+RT              | 56 (9.12%)   | 20 (4.81%)   | 36 (18.18%)   |
|                              | brachy+RT             | 13 (2.12%)   | 9 (2.16%)    | 4 (2.02%)     |
|                              | chemo only            | 46 (7.49%)   | 11 (2.64%)   | 35 (17.68%)   |
|                              | chemo+brachy+RT+boost | 3 (0.49%)    | 2 (0.48%)    | 1 (0.51%)     |
| horm only                    | 1 (0.16%)             | 1 (0.24%)    | 0            |               |

**Supplementary Table 4:** Distribution of samples across different centres in the CC validation cohort.

| <b>Center</b> | <b>Total</b> | <b>NSMP</b> | <b>P53abn</b> |
|---------------|--------------|-------------|---------------|
| Total         | 614          | 416         | 198           |
| LGH           | 5 (0.81%)    | 4 (0.96%)   | 1 (0.51%)     |
| HAM           | 65 (10.59%)  | 25 (6.01%)  | 40 (20.2%)    |
| ARH           | 8 (1.3%)     | 8 (1.92%)   | 0 (0.0%)      |
| CHM           | 19 (3.09%)   | 14 (3.37%)  | 5 (2.53%)     |
| CMX           | 1 (0.16%)    | 1 (0.24%)   | 0 (0.0%)      |
| LAV           | 104 (16.94%) | 75 (18.03%) | 29 (14.65%)   |
| RGH           | 3 (0.49%)    | 3 (0.72%)   | 0 (0.0%)      |
| PEN           | 2 (0.33%)    | 2 (0.48%)   | 0 (0.0%)      |
| NAN           | 6 (0.98%)    | 5 (1.2%)    | 1 (0.51%)     |
| RJH           | 27 (4.4%)    | 21 (5.05%)  | 6 (3.03%)     |
| SSK           | 18 (2.93%)   | 12 (2.88%)  | 6 (3.03%)     |
| KAM           | 4 (0.65%)    | 3 (0.72%)   | 1 (0.51%)     |
| BBY           | 2 (0.33%)    | 2 (0.48%)   | 0 (0.0%)      |
| VER           | 1 (0.16%)    | 1 (0.24%)   | 0 (0.0%)      |
| JGH           | 39 (6.35%)   | 26 (6.25%)  | 13 (6.57%)    |
| KEL           | 4 (0.65%)    | 4 (0.96%)   | 0 (0.0%)      |
| WPG           | 19 (3.09%)   | 15 (3.61%)  | 4 (2.02%)     |
| CRN           | 1 (0.16%)    | 1 (0.24%)   | 0 (0.0%)      |
| UNH           | 5 (0.81%)    | 5 (1.2%)    | 0 (0.0%)      |
| RCH           | 12 (1.95%)   | 12 (2.88%)  | 0 (0.0%)      |
| NSH           | 56 (9.12%)   | 47 (11.3%)  | 9 (4.55%)     |
| SUN           | 115 (18.73%) | 55 (13.22%) | 60 (30.3%)    |
| VGH           | 81 (13.19%)  | 58 (13.94%) | 23 (11.62%)   |
| SPH           | 8 (1.3%)     | 8 (1.92%)   | 0 (0.0%)      |
| TRL           | 2 (0.33%)    | 2 (0.48%)   | 0 (0.0%)      |
| SMH           | 7 (1.14%)    | 7 (1.68%)   | 0 (0.0%)      |

**Supplementary Table 5:** Accuracy and other performance measures of the binary tumor-stroma classifier.

| <b>Non-tumor Accuracy</b> | <b>Tumor Accuracy</b> | <b>Kappa</b> | <b>F1 Score</b> | <b>AUC</b> | <b>Balanced Accuracy</b> |
|---------------------------|-----------------------|--------------|-----------------|------------|--------------------------|
| 99.89%                    | 99.61%                | 0.9952       | 0.9976          | 0.9994     | 99.75%                   |



**Supplementary Table 6:** Performance metrics of the deep learning model for p53abn vs. NSMP classifier (based on VarMIL method). The results are based on mean  $\pm$  std of 10 cross-validation splits.

| Source            | p53abn Accuracy (%) | NSMP Accuracy (%) | Kappa           | F1 score        | AUC             | Balanced Accuracy (%) |
|-------------------|---------------------|-------------------|-----------------|-----------------|-----------------|-----------------------|
| Discovery Set     | 87.17 $\pm$ 10.86   | 91.59 $\pm$ 3.58  | 0.75 $\pm$ 0.09 | 0.87 $\pm$ 0.05 | 0.95 $\pm$ 0.03 | 89.38 $\pm$ 5.49      |
| BC Validation Set | 81.99 $\pm$ 4.56    | 77.61 $\pm$ 5.62  | 0.58 $\pm$ 0.03 | 0.79 $\pm$ 0.02 | 0.88 $\pm$ 0.01 | 79.80 $\pm$ 1.34      |
| CC Validation Set | 84.76 $\pm$ 3.48    | 92.24 $\pm$ 2.1   | 0.77 $\pm$ 0.02 | 0.88 $\pm$ 0.01 | 0.95 $\pm$ 0.0  | 88.5 $\pm$ 1.08       |

**Supplementary Table 7:** Detailed accuracy and other performance measures of the VarMIL network.

| Source            | Split | Metrics             |                   |        |          |        |                   |
|-------------------|-------|---------------------|-------------------|--------|----------|--------|-------------------|
|                   |       | p53abn Accuracy (%) | NSMP Accuracy (%) | Kappa  | F1 score | AUC    | Average Score (%) |
| Discovery Set     | 1     | 70.97               | 90.48             | 0.6208 | 0.8104   | 0.9078 | 80.72             |
|                   | 2     | 64.52               | 89.41             | 0.5506 | 0.7752   | 0.9120 | 76.96             |
|                   | 3     | 96.00               | 93.33             | 0.8332 | 0.9164   | 0.9867 | 94.67             |
|                   | 4     | 92.59               | 91.67             | 0.7928 | 0.8961   | 0.9749 | 92.13             |
|                   | 5     | 96.30               | 85.71             | 0.7205 | 0.8586   | 0.9616 | 91.01             |
|                   | 6     | 96.30               | 89.41             | 0.7784 | 0.8885   | 0.9760 | 92.85             |
|                   | 7     | 96.15               | 87.76             | 0.7262 | 0.8617   | 0.9380 | 91.95             |
|                   | 8     | 88.46               | 94.90             | 0.8107 | 0.9053   | 0.9686 | 91.68             |
|                   | 9     | 80.77               | 97.98             | 0.8225 | 0.9112   | 0.9526 | 89.37             |
|                   | 10    | 89.66               | 95.29             | 0.8400 | 0.9200   | 0.9542 | 92.47             |
| BC Validation Set | 1     | 85.78               | 75.82             | 0.5897 | 0.7930   | 0.8836 | 80.80             |
|                   | 2     | 81.28               | 81.19             | 0.6121 | 0.8057   | 0.8822 | 81.24             |
|                   | 3     | 81.52               | 82.24             | 0.6263 | 0.8129   | 0.8972 | 81.88             |
|                   | 4     | 89.34               | 70.60             | 0.5619 | 0.7767   | 0.8869 | 79.97             |
|                   | 5     | 79.86               | 81.49             | 0.6032 | 0.8013   | 0.8892 | 80.68             |
|                   | 6     | 76.07               | 81.79             | 0.5733 | 0.7866   | 0.8766 | 78.93             |
|                   | 7     | 90.05               | 64.03             | 0.4974 | 0.7403   | 0.8679 | 77.04             |
|                   | 8     | 78.67               | 79.70             | 0.5722 | 0.7857   | 0.8755 | 79.19             |
|                   | 9     | 77.96               | 79.70             | 0.5660 | 0.7826   | 0.8731 | 78.83             |
|                   | 10    | 79.38               | 79.55             | 0.5767 | 0.7879   | 0.8742 | 79.47             |
| CC Validation Set | 1     | 81.07               | 94.17             | 0.7659 | 0.8829   | 0.9428 | 87.62             |
|                   | 2     | 84.47               | 93.01             | 0.7767 | 0.8883   | 0.9491 | 88.74             |
|                   | 3     | 85.92               | 93.24             | 0.7916 | 0.8958   | 0.9545 | 89.58             |
|                   | 4     | 89.81               | 91.38             | 0.7957 | 0.8978   | 0.9507 | 90.59             |
|                   | 5     | 78.64               | 94.64             | 0.7527 | 0.8762   | 0.9471 | 86.64             |
|                   | 6     | 86.41               | 91.14             | 0.7658 | 0.8829   | 0.9439 | 88.77             |
|                   | 7     | 89.32               | 88.34             | 0.7502 | 0.8748   | 0.9430 | 88.83             |
|                   | 8     | 85.92               | 91.84             | 0.7718 | 0.8859   | 0.9418 | 88.88             |
|                   | 9     | 85.44               | 89.51             | 0.7356 | 0.8677   | 0.9394 | 87.47             |
|                   | 10    | 80.58               | 95.10             | 0.7755 | 0.8876   | 0.9526 | 87.84             |

**Supplementary Table 8:** Statistics of NSMP and *p53abn-like NSMP* patients based on p53abn vs. NSMP classifiers.

| Source            | Number of patients | NSMP         | <i>p53abn-like NSMP</i> |
|-------------------|--------------------|--------------|-------------------------|
| Discovery Set     | 272                | 224 (82.35%) | 48 (17.65%)             |
| BC Validation Set | 195                | 156 (80%)    | 39 (20%)                |
| CC Validation Set | 416                | 390 (93.75%) | 26 (6.25%)              |

**Supplementary Table 9:** Performance benchmarking of Vanilla (A), IDaRS (B), Histogram (C), DeepMIL (D), VLAD (E), CLAM-MB (F), CLAM-SB (G), and TransMIL (H) models for the discovery and validation sets.

## A: Vanilla

| Source            | P53abn Accuracy (%) | NSMP Accuracy (%) | Kappa       | F1 score    | AUC         | Balanced Accuracy (%) |
|-------------------|---------------------|-------------------|-------------|-------------|-------------|-----------------------|
| Discovery Set     | 74.80 ± 11.91       | 92.28 ± 5.51      | 0.68 ± 0.10 | 0.84 ± 0.05 | 0.93 ± 0.04 | 83.54 ± 5.69          |
| BC Validation Set | 79.46 ± 7.51        | 75.22 ± 11.43     | 0.53 ± 0.07 | 0.76 ± 0.04 | 0.84 ± 0.02 | 77.34 ± 2.85          |
| CC Validation Set | 57.96 ± 30.74       | 74.69 ± 34.19     | 0.34 ± 0.18 | 0.62 ± 0.15 | 0.88 ± 0.04 | 66.32 ± 8.6           |

## B: IDaRS

| Source            | p53abn Accuracy (%) | NSMP Accuracy (%) | Kappa        | F1 score    | AUC         | Balanced Accuracy (%) |
|-------------------|---------------------|-------------------|--------------|-------------|-------------|-----------------------|
| Discovery Set     | 81.63 ± 9.78        | 88.61 ± 5.22      | 0.66 ± 0.07  | 0.83 ± 0.04 | 0.93 ± 0.03 | 85.12 ± 3.98          |
| BC Validation Set | 83.41 ± 5.21        | 71.19 ± 10.90     | 0.52 ± 0.08  | 0.75 ± 0.05 | 0.84 ± 0.02 | 77.30 ± 3.34          |
| CC Validation Set | 86.07 ± 3.56        | 86.20 ± 10.41     | 0.7024 ± 0.1 | 0.85 ± 0.06 | 0.93 ± 0.01 | 86.13 ± 3.56          |

## C: Histogram

| Source            | p53abn Accuracy (%) | NSMP Accuracy (%) | Kappa       | F1 score    | AUC         | Balanced Accuracy (%) |
|-------------------|---------------------|-------------------|-------------|-------------|-------------|-----------------------|
| Discovery Set     | 72.38 ± 10.26       | 94.83 ± 2.64      | 0.70 ± 0.10 | 0.85 ± 0.05 | 0.88 ± 0.05 | 83.60 ± 5.34          |
| BC Validation Set | 75.88 ± 5.58        | 81.04 ± 4.95      | 0.56 ± 0.04 | 0.78 ± 0.02 | 0.80 ± 0.02 | 78.46 ± 1.77          |
| CC Validation Set | 80.68 ± 5.65        | 93.68 ± 1.72      | 0.76 ± 0.03 | 0.88 ± 0.02 | 0.92 ± 0.01 | 87.18 ± 2.29          |

## D: DeepMIL

| Source            | p53abn Accuracy (%) | NSMP Accuracy (%) | Kappa         | F1 score    | AUC         | Balanced Accuracy (%) |
|-------------------|---------------------|-------------------|---------------|-------------|-------------|-----------------------|
| Discovery Set     | 85.72 ± 11.55       | 91.45 ± 4.31      | 0.74 ± 0.12   | 0.87 ± 0.06 | 0.95 ± 0.03 | 88.58 ± 6.60          |
| BC Validation Set | 82.84 ± 4.15        | 77.60 ± 5.65      | 0.59 ± 0.03   | 0.79 ± 0.02 | 0.88 ± 0.01 | 80.22 ± 1.32          |
| CC Validation Set | 83.69 ± 1.77        | 93.26 ± 0.83      | 0.7741 ± 0.01 | 0.89 ± 0    | 0.95 ± 0    | 88.48 ± 0.61          |

## E: VLAD

| Source            | p53abn Accuracy (%) | NSMP Accuracy (%) | Kappa       | F1 score    | AUC         | Balanced Accuracy (%) |
|-------------------|---------------------|-------------------|-------------|-------------|-------------|-----------------------|
| Discovery Set     | 79.11 ± 6.67        | 93.43 ± 2.45      | 0.73 ± 0.08 | 0.86 ± 0.04 | 0.92 ± 0.04 | 86.27 ± 3.87          |
| BC Validation Set | 77.48 ± 4.56        | 80.36 ± 3.50      | 0.57 ± 0.03 | 0.78 ± 0.01 | 0.84 ± 0.01 | 78.92 ± 1.53          |
| CC Validation Set | 83.18 ± 2.09        | 92.27 ± 1.14      | 0.76 ± 0.02 | 0.88 ± 0.01 | 0.93 ± 0.01 | 87.72 ± 1.05          |

## F: CLAM-MB

| Source            | p53abn Accuracy (%) | NSMP Accuracy (%) | Kappa       | F1 score    | AUC         | Balanced Accuracy (%) |
|-------------------|---------------------|-------------------|-------------|-------------|-------------|-----------------------|
| Discovery Set     | 86.53 ± 11.8        | 97.72 ± 1.42      | 0.86 ± 0.1  | 0.93 ± 0.05 | 0.93 ± 0.06 | 92.12 ± 6.06          |
| BC Validation Set | 77.15 ± 7.05        | 79.63 ± 7.93      | 0.56 ± 0.04 | 0.78 ± 0.02 | 0.85 ± 0.01 | 78.39 ± 1.33          |
| CC Validation Set | 78.59 ± 5.61        | 94.22 ± 2.29      | 0.75 ± 0.03 | 0.87 ± 0.01 | 0.88 ± 0.02 | 86.41 ± 1.94          |

## G: CLAM-SB

| Source            | p53abn Accuracy (%) | NSMP Accuracy (%) | Kappa       | F1 score    | AUC         | Balanced Accuracy (%) |
|-------------------|---------------------|-------------------|-------------|-------------|-------------|-----------------------|
| Discovery Set     | 86.97 ± 10.36       | 97.51 ± 2.78      | 0.86 ± 0.1  | 0.93 ± 0.05 | 0.92 ± 0.06 | 92.24 ± 5.56          |
| BC Validation Set | 78.13 ± 6.8         | 79.65 ± 6.49      | 0.57 ± 0.03 | 0.78 ± 0.01 | 0.85 ± 0.01 | 78.89 ± 1.12          |
| CC Validation Set | 78.25 ± 5.1         | 94.97 ± 1.32      | 0.75 ± 0.03 | 0.88 ± 0.01 | 0.88 ± 0.02 | 86.61 ± 1.99          |

## H: TransMIL

| Source            | p53abn Accuracy (%) | NSMP Accuracy (%) | Kappa       | F1 score    | AUC         | Balanced Accuracy (%) |
|-------------------|---------------------|-------------------|-------------|-------------|-------------|-----------------------|
| Discovery Set     | 92.45 ± 8.39        | 97.46 ± 2.8       | 0.90 ± 0.   | 0.95 ± 0.05 | 0.98 ± 0.03 | 94.95 ± 5.29          |
| BC Validation Set | 82.44 ± 13.93       | 70.39 ± 13.97     | 0.5 ± 0.09  | 0.74 ± 0.05 | 0.88 ± 0.01 | 76.41 ± 4.32          |
| CC Validation Set | 81.46 ± 4.59        | 94.48 ± 1.64      | 0.77 ± 0.02 | 0.89 ± 0.01 | 0.95 ± 0    | 87.97 ± 1.54          |

**Supplementary Table 10:** Statistics of NSMP and p53abn-like NSMP patients based on p53abn vs. NSMP Vanilla (A), IDaRS (B), Histogram (C), DeepMIL (D), VLAD (E), CLAM-MB (F), CLAM-SB (G), and TransMIL (H) models for the discovery and validation sets.

A: Vanilla

| Source            | Number of patients | NSMP         | p53abn-like NSMP |
|-------------------|--------------------|--------------|------------------|
| Discovery Set     | 272                | 213 (78.31%) | 59 (21.69%)      |
| BC Validation Set | 195                | 163 (83.59%) | 32 (16.41%)      |
| CC Validation Set | 416                | 412 (99.04%) | 4 (0.96%)        |

B: IDaRS

| Source            | Number of patients | NSMP         | p53abn-like NSMP |
|-------------------|--------------------|--------------|------------------|
| Discovery Set     | 272                | 200 (73.53%) | 72 (26.47%)      |
| BC Validation Set | 195                | 152 (77.95%) | 43 (22.05%)      |
| CC Validation Set | 416                | 391 (93.99%) | 25 (6.01%)       |

C: Histogram

| Source            | Number of patients | NSMP         | p53abn-like NSMP |
|-------------------|--------------------|--------------|------------------|
| Discovery Set     | 272                | 232 (85.29%) | 40 (14.71%)      |
| BC Validation Set | 195                | 172 (88.21%) | 23 (11.79%)      |
| CC Validation Set | 416                | 399 (95.91%) | 17 (4.09%)       |

D: DeepMIL

| Source            | Number of patients | NSMP         | p53abn-like NSMP |
|-------------------|--------------------|--------------|------------------|
| Discovery Set     | 272                | 228 (83.82%) | 44 (16.18%)      |
| BC Validation Set | 195                | 157 (80.51%) | 38 (19.49%)      |
| CC Validation Set | 416                | 392 (94.23%) | 24 (5.77%)       |

E: VLAD

| Source            | Number of patients | NSMP         | p53abn-like NSMP |
|-------------------|--------------------|--------------|------------------|
| Discovery Set     | 272                | 232 (85.29%) | 40 (14.71%)      |
| BC Validation Set | 195                | 166 (85.13%) | 29 (14.87%)      |
| CC Validation Set | 416                | 394 (94.71%) | 22 (5.29%)       |

F: CLAM-MB

| Source        | Number of patients | NSMP         | p53abn-like NSMP |
|---------------|--------------------|--------------|------------------|
| Discovery Set | 272                | 251 (92.28%) | 21 (7.72%)       |

|                   |     |              |             |
|-------------------|-----|--------------|-------------|
| BC Validation Set | 195 | 161 (82.56%) | 34 (17.44%) |
| CC Validation Set | 416 | 398 (95.67%) | 18 (4.33%)  |

F: CLAM-SB

| Source            | Number of patients | NSMP         | p53abn-like NSMP |
|-------------------|--------------------|--------------|------------------|
| Discovery Set     | 272                | 247 (90.81%) | 25 (9.19%)       |
| BC Validation Set | 195                | 152 (77.95%) | 43 (22.05%)      |
| CC Validation Set | 416                | 396 (95.19%) | 20 (4.81%)       |

F: TransMIL

| Source            | Number of patients | NSMP         | p53abn-like NSMP |
|-------------------|--------------------|--------------|------------------|
| Discovery Set     | 272                | 248 (91.18%) | 24 (8.82%)       |
| BC Validation Set | 195                | 131 (67.18%) | 64 (32.82%)      |
| CC Validation Set | 416                | 397 (95.43%) | 19 (4.57%)       |

**Supplementary Table 11:** Clinicopathologic features of the *p53abn-like NSMP* group in the discovery set.

| Variable                | Total        | NSMP         | <i>p53abn-like NSMP</i> | p53abn      |
|-------------------------|--------------|--------------|-------------------------|-------------|
| <b>Total</b>            | 363          | 221 (60.88%) | 47 (12.95%)             | 95 (26.17%) |
| <b>Age at diagnosis</b> |              |              |                         |             |
| <60 yrs                 | 121 (33.33%) | 90 (40.72%)  | 20 (42.55%)             | 11 (11.58%) |
| ≥60 yrs                 | 242 (66.67%) | 131 (59.28%) | 27 (57.45%)             | 84 (88.42%) |
| <b>Histotype</b>        |              |              |                         |             |
| Endometrioid            | 288 (79.34%) | 220 (99.55%) | 42 (89.36%)             | 26 (27.37%) |
| Non-endometrioid        | 75 (20.66%)  | 1 (0.45%)    | 5 (10.64%)              | 69 (72.63%) |
| <b>Tumour grade</b>     |              |              |                         |             |
| Low grade (G1-2)        | 258 (71.07%) | 215 (97.29%) | 31 (65.96%)             | 12 (12.63%) |
| High grade (G3)         | 105 (28.93%) | 6 (2.71%)    | 16 (34.04%)             | 83 (87.37%) |
| <b>FIGO stage</b>       |              |              |                         |             |
| I-II                    | 291 (80.17%) | 203 (91.86%) | 36 (76.60%)             | 52 (54.74%) |
| III-IV                  | 71 (19.56%)  | 18 (8.14%)   | 10 (21.28%)             | 43 (45.26%) |
| Unknown                 | 1 (0.28%)    | 0            | 1 (2.13%)               | 0           |

**Supplementary Table 12:** Clinicopathologic features of the *p53abn-like NSMP* group in the BC validation set without excluding any patients.

| Variable                | Total        | NSMP         | <i>p53abn-like NSMP</i> | p53abn      |
|-------------------------|--------------|--------------|-------------------------|-------------|
| <b>Total</b>            | 288          | 155 (53.82%) | 38 (13.19%)             | 95 (32.99%) |
| <b>Age at diagnosis</b> |              |              |                         |             |
| <60 yrs                 | 81 (28.13%)  | 61 (39.36%)  | 11 (28.95%)             | 9 (9.47%)   |
| ≥60 yrs                 | 205 (71.18%) | 92 (59.35%)  | 27 (71.05%)             | 86 (90.53%) |
| Unknown                 | 2 (0.69%)    | 2 (1.29%)    | 0                       | 0           |
| <b>Histotype</b>        |              |              |                         |             |
| Endometrioid            | 195 (67.71%) | 145 (93.55%) | 27 (71.05%)             | 23 (24.21%) |
| Non-endometrioid        | 91 (31.60%)  | 8 (5.16%)    | 11 (28.95%)             | 72 (75.79%) |
| Unknown                 | 2 (0.69%)    | 2 (1.29%)    | 0                       | 0           |
| <b>Tumour grade</b>     |              |              |                         |             |
| Low grade (G1–2)        | 151 (52.43%) | 140 (90.32%) | 6 (15.79%)              | 5 (5.26%)   |
| High grade (G3)         | 137 (47.57%) | 15 (9.68%)   | 32 (84.21%)             | 90 (94.74%) |
| <b>FIGO stage</b>       |              |              |                         |             |
| I-II                    | 216 (75.00%) | 138 (89.03%) | 28 (73.68%)             | 50 (52.63%) |
| III-IV                  | 69 (23.96%)  | 14 (9.03%)   | 10 (26.32%)             | 45 (47.37%) |
| Unknown                 | 3 (1.04%)    | 3 (1.94%)    | 0                       | 0           |

**Supplementary Table 13:** Clinicopathologic features of the *p53abn-like NSMP* group in the CC validation set without excluding any patients.

| Variable                | Total        | NSMP         | <i>p53abn-like NSMP</i> | p53abn       |
|-------------------------|--------------|--------------|-------------------------|--------------|
| <b>Total</b>            | 614          | 390 (63.52%) | 26 (4.23%)              | 198 (32.25%) |
| <b>Age at diagnosis</b> |              |              |                         |              |
| <60 yrs                 | 199 (32.41%) | 158 (40.51%) | 10 (38.46%)             | 31 (15.66%)  |
| ≥60 yrs                 | 415 (67.59%) | 232 (59.49%) | 16 (61.54%)             | 167 (84.34%) |
| Unknown                 | 0            | 0            | 0                       | 0            |
| <b>Histotype</b>        |              |              |                         |              |
| Endometrioid            | 419 (68.24%) | 367 (94.1%)  | 13 (50.0%)              | 39 (19.7%)   |
| Non-endometrioid        | 195 (31.76%) | 23 (5.9%)    | 13 (50.0%)              | 159 (80.3%)  |
| Unknown                 | 0            | 0            | 0                       | 0            |
| <b>Tumour grade</b>     |              |              |                         |              |
| Low grade (G1–2)        | 390 (63.52%) | 371 (95.13%) | 5 (19.23%)              | 14 (7.07%)   |
| High grade (G3)         | 199 (32.41%) | 19 (4.87%)   | 19 (73.08%)             | 161 (81.31%) |
| Unknown                 | 25 (4.07%)   | 0            | 2 (7.69%)               | 23 (11.62%)  |
| <b>FIGO stage</b>       |              |              |                         |              |
| I-II                    | 487 (79.32%) | 350 (89.74%) | 19 (73.08%)             | 118 (59.6%)  |
| III-IV                  | 127 (20.68%) | 40 (10.26%)  | 7 (26.92%)              | 80 (40.4%)   |
| Unknown                 | 0            | 0            | 0                       | 0            |

**Supplementary Table 14:** Multi-variate Cox regression analysis showing the prognostic significance of *p53abn-like NSMP* group PFS for the entire cohort.

| Variable                                      | Hazard ratio | <i>p</i> |
|-----------------------------------------------|--------------|----------|
| Grade                                         | 2.35         | 0.04     |
| Stage                                         | 3.94         | 1.2e-5   |
| Histology (endometrioid vs. non-endometrioid) | 1.1          | 0.82     |
| <i>p53abn-like NSMP</i>                       | 2.53         | 0.01     |
